# Supplementary material
Source: PubMed Central journal article supplement (PMC3911043)
Supplement: AEM.03696-13_zam999105136so1.pdf [file AEM.03696-13_zam999105136so1.pdf]

**Table S1. Primers used for the detection of the *iee* gene and IS elements**

| Target     | Primer name | Sequence                       | Expected amplicon size (bp) |
|------------|-------------|--------------------------------|-----------------------------|
| <i>iee</i> | ieeF4       | GATAAACGATTTGCCGGGACGGAATG     | 280                         |
|            | ieeR4       | GTTTACCTCCCCGATAATACCAATAC     |                             |
| IS629      | IS629-TF1   | ACTAAAATACTCGTTTTTCCCCGAAG     | 1,208                       |
|            | IS629-TR1   | GGCTGCCAGATCATCGTTTCCGATG      |                             |
| IS911      | IS911-TF1   | AAAAAAGAAATTTACAGCGCAGAGTTTAAA | 1,141                       |
|            | IS911-TR1   | GAGTTTTTCCAGTATCGGTTTTCCGAT    |                             |
| IS3        | IS3-TF1     | ACAAAAACAGTATCAACCAGTAAAAACCC  | 1,157                       |
|            | IS3-TR1     | AGCGAGGTTCTTGTTCATCAATTGTTCC   |                             |
| IS2        | IS2-TF1     | ATTGATGTCTTAGGGCCGAGAAAACG     | 1,223                       |
|            | IS2-TR1     | TATTTCCAGACATCTGTTATCACTTAACC  |                             |
| IS1        | IS1-TF1     | GCTTCTGTTTCTATCAGCTGTCCCTC     | 692                         |
|            | IS1-TR1     | TTGATAGTGTTCATGTTTCAATAATGCC   |                             |
| IS4        | IS4-TF1     | CACATTGGACAGGCTCTTGATCTGGT     | 1,323                       |
|            | IS4-TR1     | AGCAACTGACTGGCTCTTTTTCGGGG     |                             |
| IS5        | IS5-TF1     | AGTCATCAACTTACCTTCGCCGACAG     | 975                         |
|            | IS5-TR1     | GTGAGATCTCTCCCACTGACGTATCA     |                             |
| IS26       | IS26-TF1    | AACCCATTCAAAGCCCGCATTTCAG      | 699                         |
|            | IS26-TR1    | CATTTCAAAACTCTGCTTACCAGGCG     |                             |
| IS30       | IS30-TF1    | AGACGAACTATTACAGCAGAGGAAAAAG   | 1,146                       |
|            | IS30-TR1    | ATCTGTCAATGCAACACCCCTTTCAATT   |                             |
| IS621      | IS621-TF1   | GAACATGAACTTCATTATATCGGTATCGAC | 975                         |
|            | IS621-TR1   | CGCCGCTACCGGATTATGCCGTGA       |                             |

**Table S2. Newly-designed primers used for the analysis of the genomic structures of *iee*-containing elements**

| Primer name | Sequence                       | Primer coordinates | Accession number |
|-------------|--------------------------------|--------------------|------------------|
| ieeE-f      | CCAGTTGTCGAACCCCGGTCGGGGCTTCTC | 1187053–1187082    | CP002729         |
| 113.9-r2    | GTTGGTTTTGTAATTCCAGCTCAACC     | 1277823–1277798    | CP002729         |
| IE0231-f    | TCATCCAGGACAACCTGAAAAACCGC     | 987783–987809      | CP002729         |
| IE0231-r    | GGCGAAGAGAAAGAACGAGTAAAAGGTC   | 988755–988782      | CP002729         |

**Table S3. Primers used for RETS-PCR to analyze the junctions of SpLE1-like IE in E0231**

| Target    | Primer name | Sequence <sup>a</sup>          | Step of RETS-PCR |
|-----------|-------------|--------------------------------|------------------|
| 5' region | E0231J-R1   | GCCATTAGTCTCTCGCTTCACNNNNNNNNN | First            |
|           | E0231J-R 2  | GCCATTAGTCTCTCGCTTCAC          | Second           |
|           | E0231J-R 3  | CTAAGAATACATTAGATAATATCGGACAAC | Third            |
| 3' region | E0231J-F1   | CGGGGCATATAAACCGGTTTCNNNNNNNNN | First            |
|           | E0231J-F 2  | CGGGGCATATAAACCGGTTTC          | Second           |
|           | E0231J-F 3  | TTCAGATGGCATAACCGATGGCATAAC    | Third            |

<sup>a</sup> N, a mixture of A, G, C, and T.

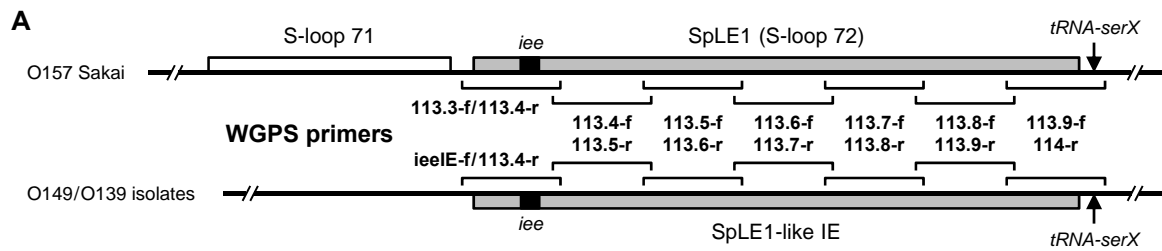

**B**

| Strain                                          | Source   | Serotype | <i>iee</i> | PCR primers       |                    |                    |                    |                    |                    |                  |  |
|-------------------------------------------------|----------|----------|------------|-------------------|--------------------|--------------------|--------------------|--------------------|--------------------|------------------|--|
|                                                 |          |          |            | ieeE-f<br>113.4-r | 113.4-f<br>113.5-r | 113.5-f<br>113.6-r | 113.6-f<br>113.7-r | 113.7-f<br>113.8-r | 113.8-f<br>113.9-r | 113.9-f<br>114-r |  |
| E0092, E0098, E0126                             | Ibaraki  | O149     | +          | 15 kb             | 15 kb              | 13 kb              | 14 kb              | 12 kb              | 11 kb              | 15 kb            |  |
| E0221–E0230, E0232, E0233                       | Fukuoka  | O149     | +          | 15 kb             | 15 kb              | 13 kb              | 14 kb              | 12 kb              | 11 kb              | 15 kb            |  |
| E0231                                           | Fukuoka  | O149     | +          |                   | 16 kb              | 13 kb              | 16 kb              | 12 kb              | *                  |                  |  |
| E0129                                           | Ibaraki  | O149     | –          |                   |                    |                    |                    |                    |                    |                  |  |
| E0124, E0131                                    | Ibaraki  | O139     | +          | 15 kb             | 16 kb              | 13 kb              | 14 kb              | 12 kb              | 11 kb              | 15 kb            |  |
| E0043–E0059                                     | Tokyo    | O139     | +          | 15 kb             | 16 kb              | 13 kb              | 14 kb              | 12 kb              | 11 kb              | 15 kb            |  |
| E0217–E0220                                     | Chiba    | O139     | +          | 15 kb             | 16 kb              | 13 kb              | 14 kb              | 12 kb              | 11 kb              | 15 kb            |  |
| E0095, E0111, E0115, E0128                      | Ibaraki  | O139     | –          |                   |                    |                    |                    |                    |                    |                  |  |
| E0234, E0237, E0241, E0242, E0250, E0251, E0254 | Fukuoka  | O139     | –          |                   |                    |                    |                    |                    |                    |                  |  |
| E0001–E0008                                     | Miyazaki | O139     | –          |                   |                    |                    |                    |                    |                    |                  |  |
| E0009–E0011, E0017–E0027                        | Iwate    | O139     | –          |                   |                    |                    |                    |                    |                    |                  |  |

**Figure S1.** Genomic localization of *iee* in the ETEC O139 and O149 strains. (A) Schematic representation of the PCR scanning analysis of the SpLE1-like IEs in the ETEC O139 and O149 strains. The *iee* gene (black rectangle) is located in SpLE1 or SpLE1-like IEs (gray rectangles) in the O157 Sakai and the ETEC O139/O149 strains, respectively. The names and positions of the WGPS primers used to amplify each segment are indicated. To amplify the left regions of the SpLE1-like IEs, primer *ieeE-f* was designed and used as a substitute for primer 113.3-f because the regions located upstream of the SpLE1-like IEs in the O139 and O149 ETEC strains differed in sequence from that of the SpLE1 in O157. (B) Summary of the results of the PCR scanning analysis. The strains were grouped according to their PCR amplification patterns and other strain features (i.e., source, serotype, and possession of *iee*). The segments that were not amplified are indicated by black rectangles, and those that were amplified are indicated by open rectangles with the size of each amplicon. As indicated by an asterisk, no amplicon was obtained using the primer pair 113.8-f/113.9-r in strain E0231; however, this region was amplified using the newly designed primer 113.9-r2 as a substitute for 113.9-r.

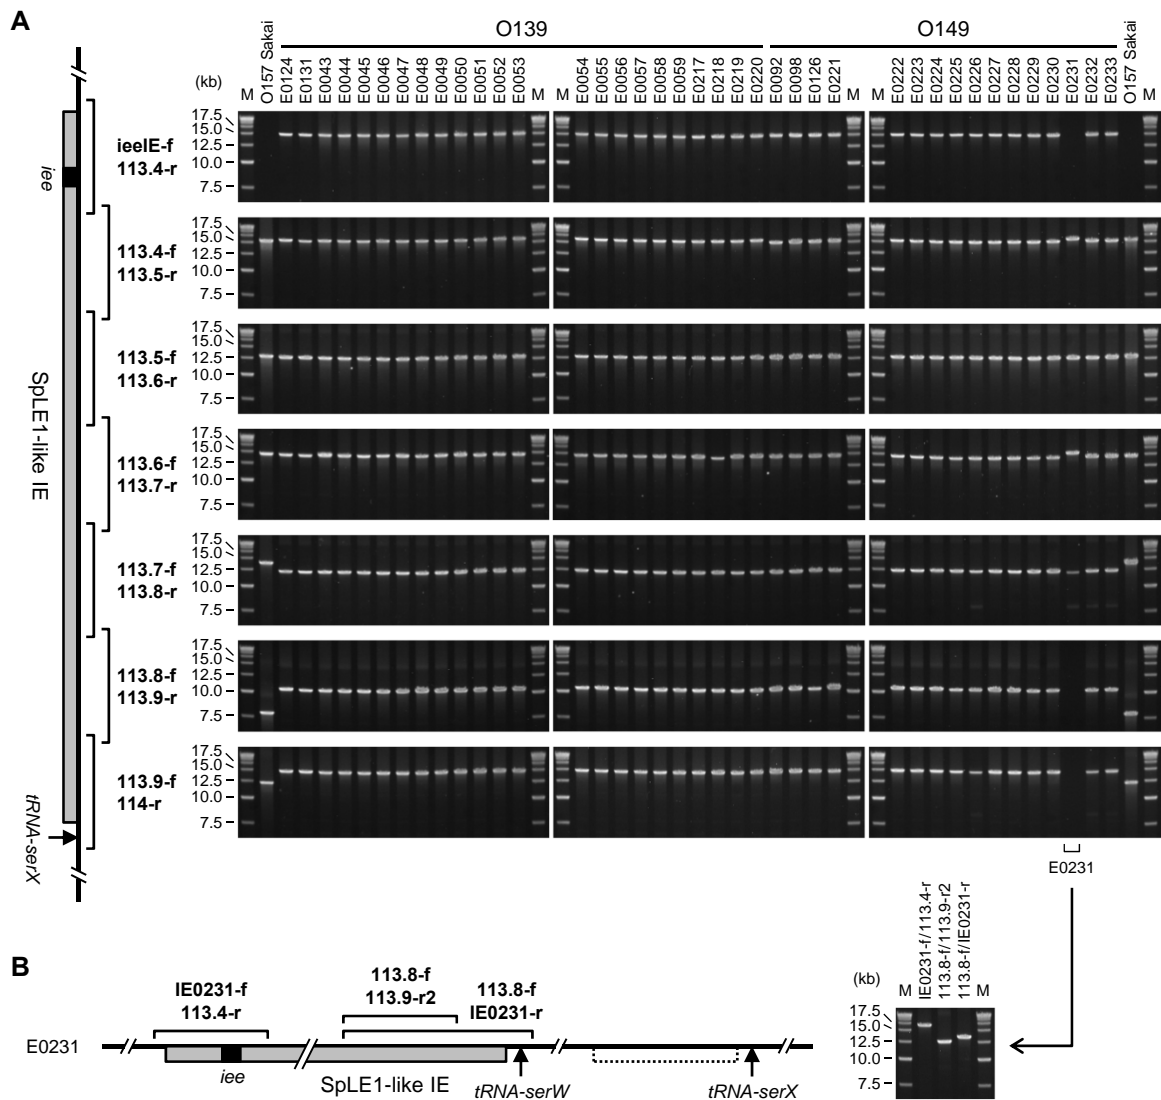

**Figure S2.** PCR scanning analysis of SpLE1-like IEs in the *iee*-positive O139 and O149 ETEC strains. (A) The results of the initial scanning are shown. O157 Sakai was analyzed as a control. The amplicons were analyzed on 0.4% agarose gels. (B) Three segments of strain E0231 that yielded no amplicon in the initial scanning were subjected to additional PCR analysis using newly designed primers. Note that the SpLE1-like IEs of all *iee*-positive O139 and O149 strains except for E0231 are integrated in the *serX* tRNA gene, as indicated by the dotted rectangles.

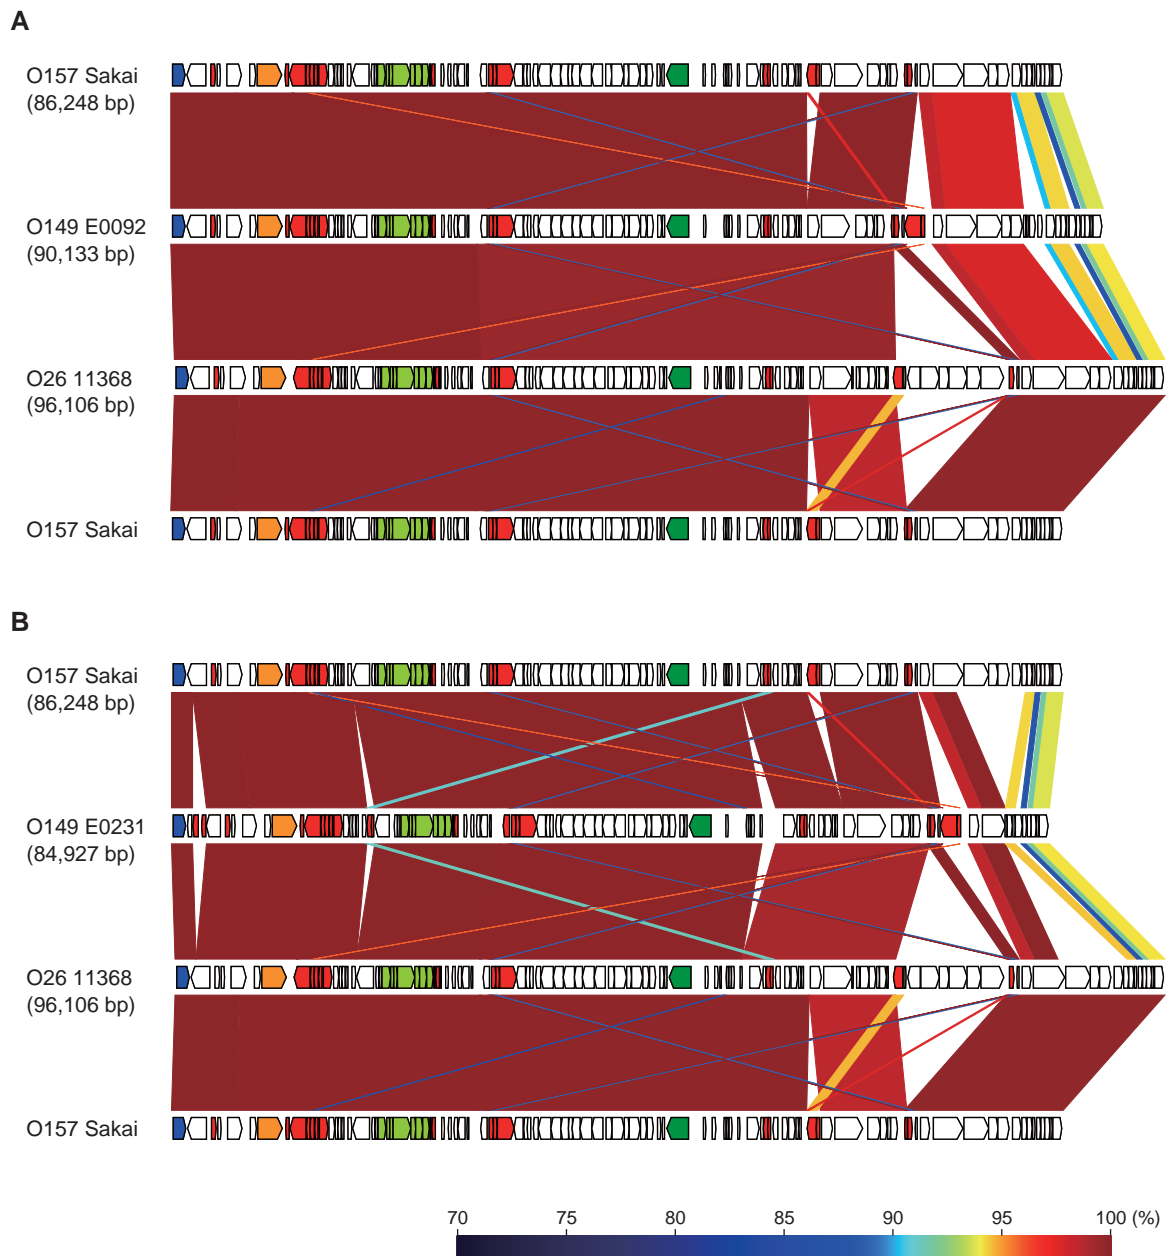

**Figure S3.** Genomic comparison of the SpLE1-like IEs of strain E0092 (A) and strain E0231 (B) with the elements of EHEC O157 and O26. The genes on each element and the sequence identities between the elements are represented as described in the legend for Fig. 4.
